# Supplementary material
Source: PubMed Central journal article supplement (PMC11441762)

# Supplementary Figure 1

**a**

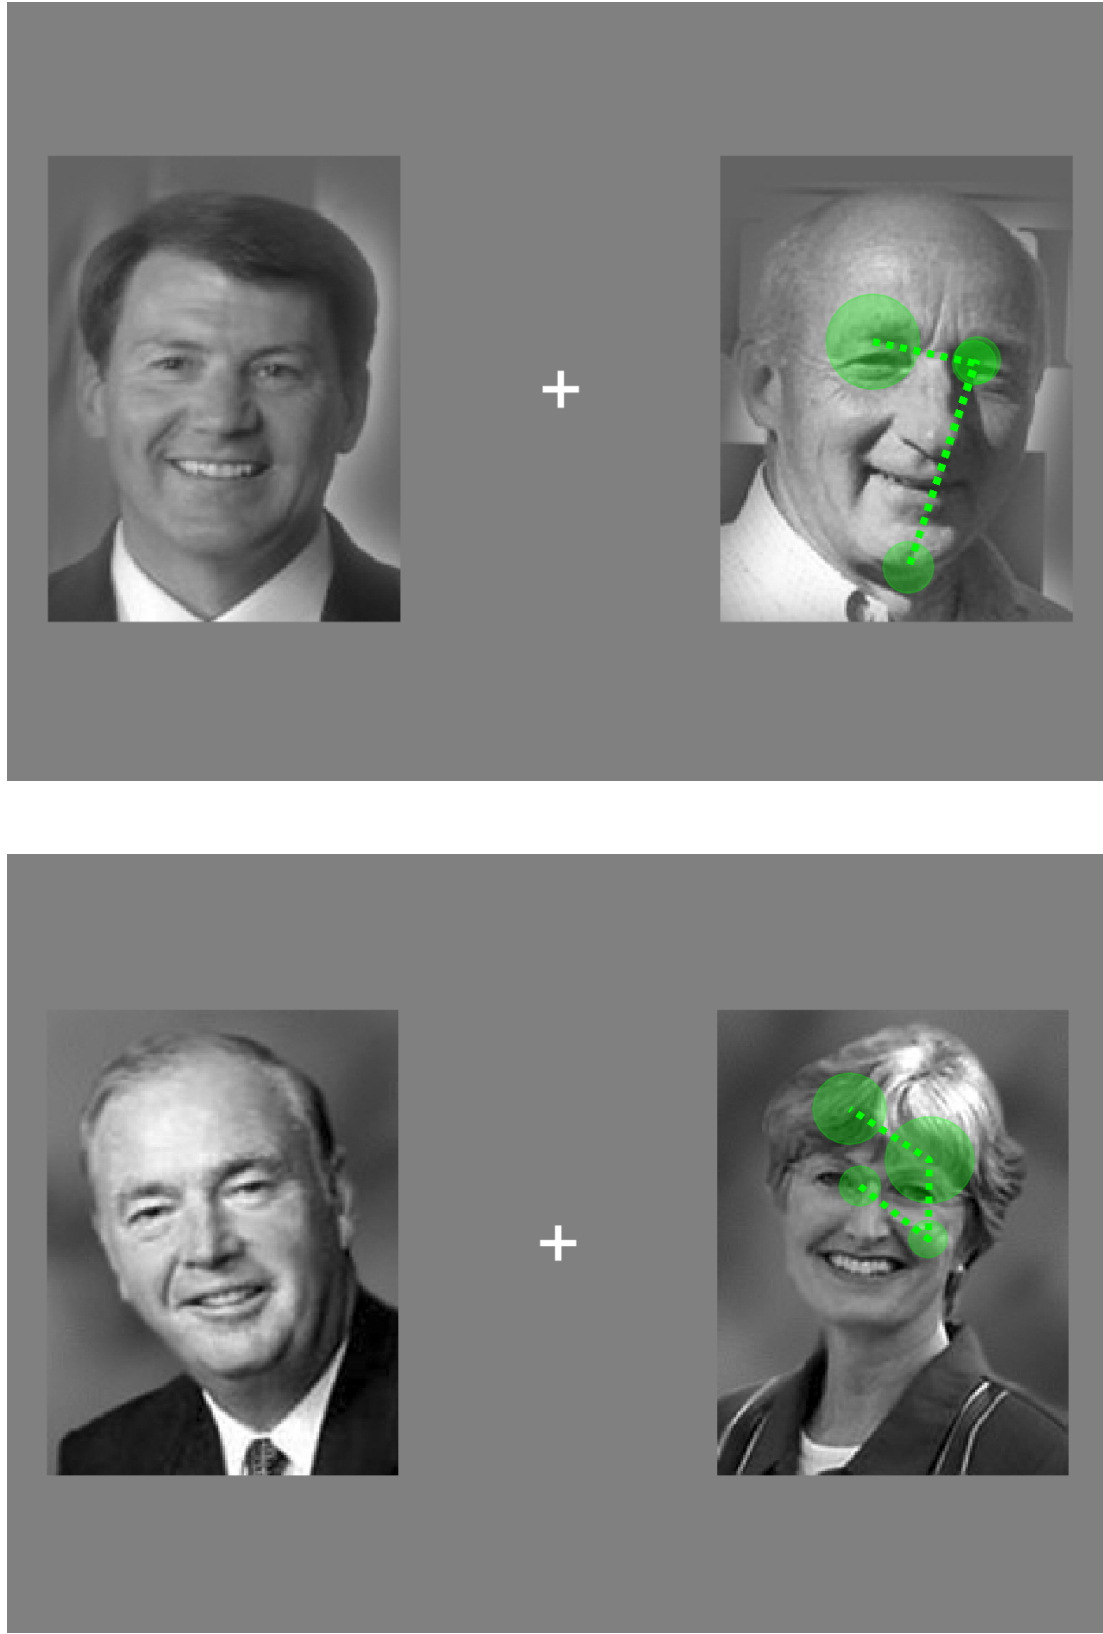

**b**

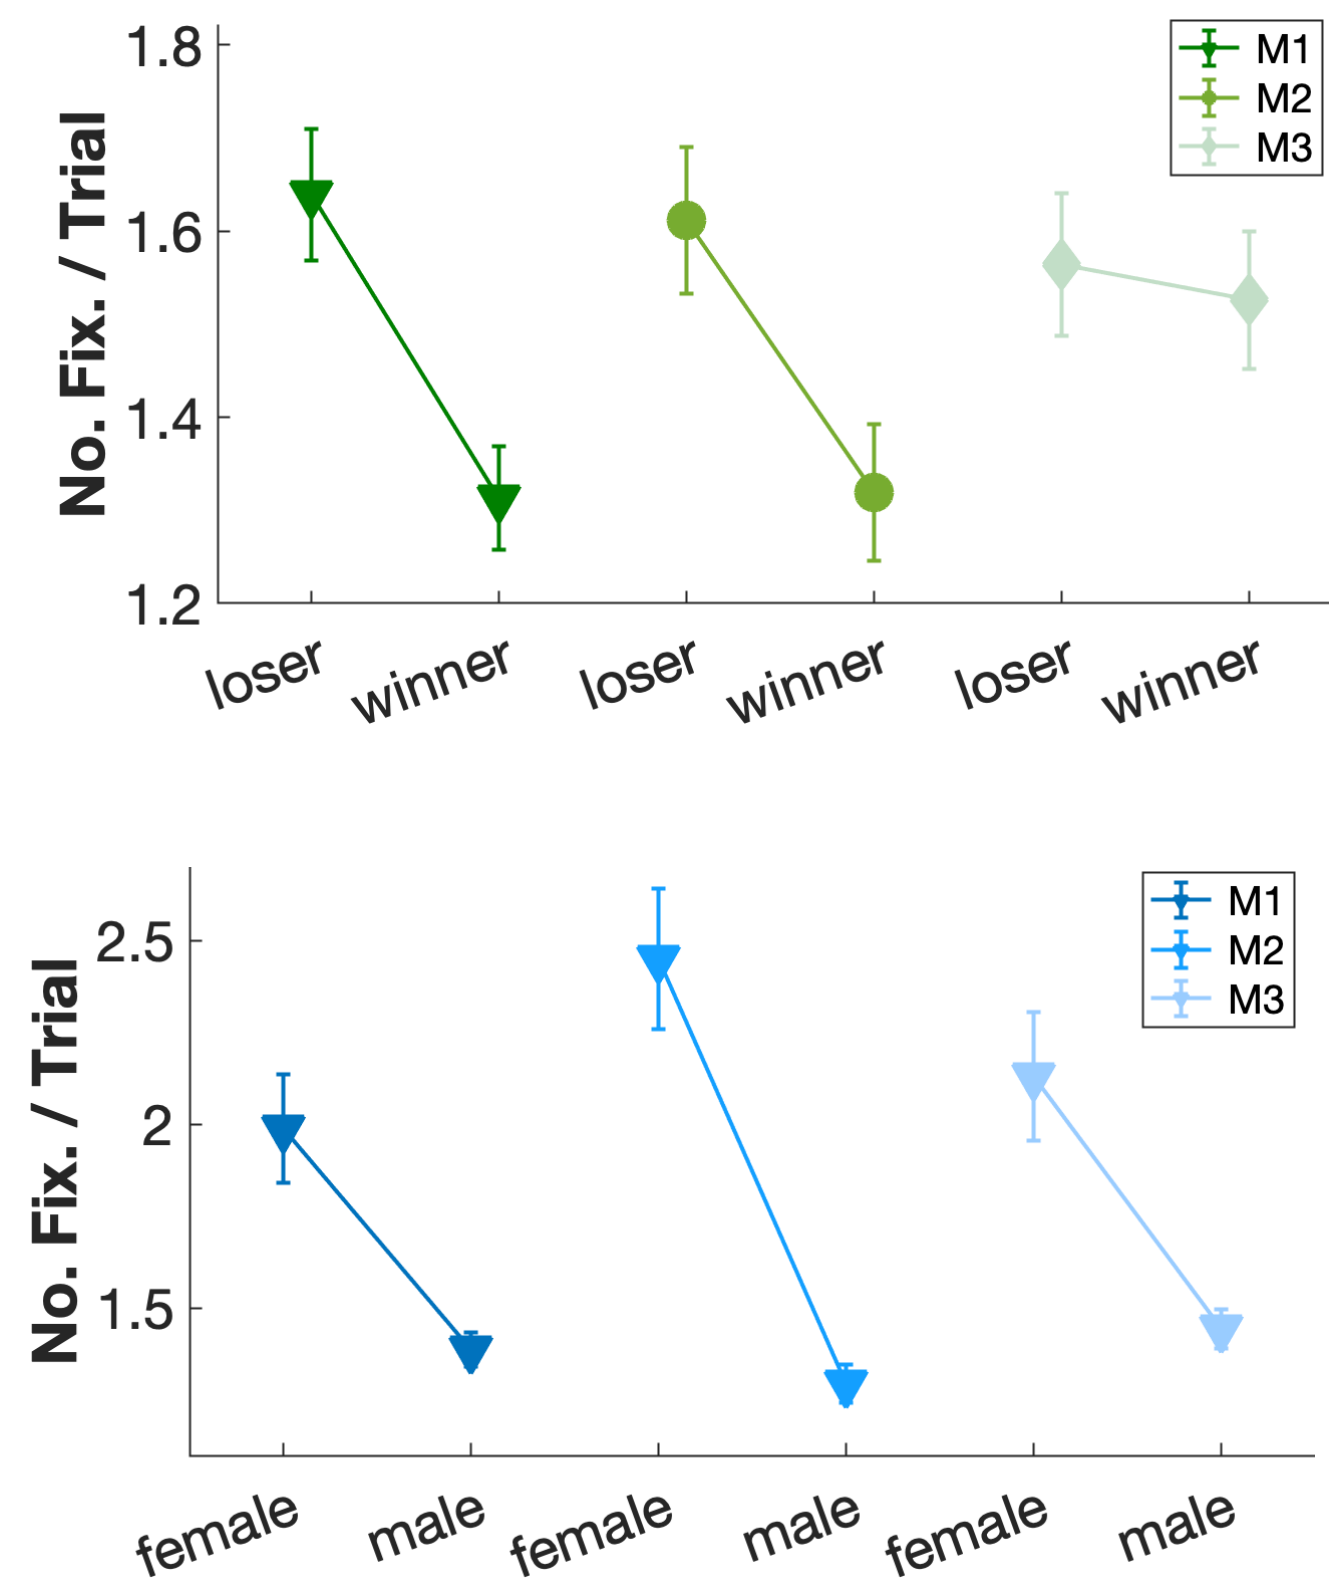

**c**

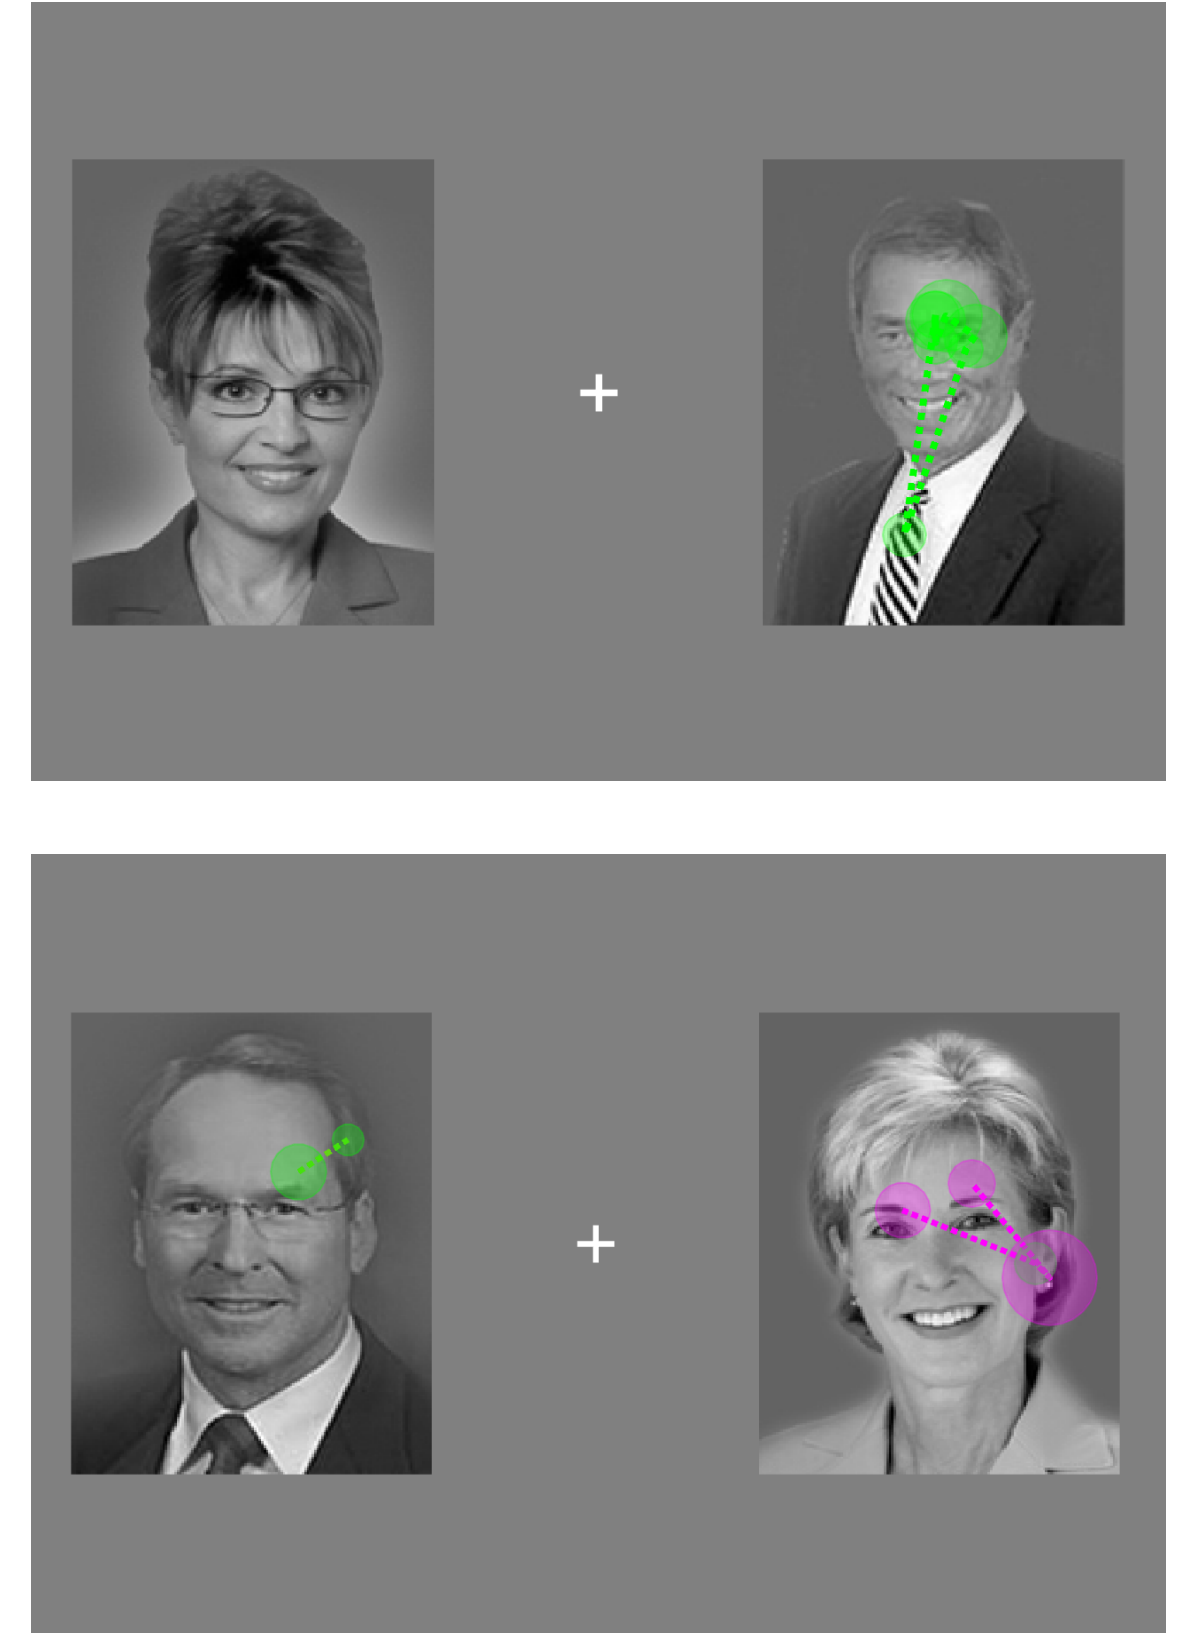

**d**

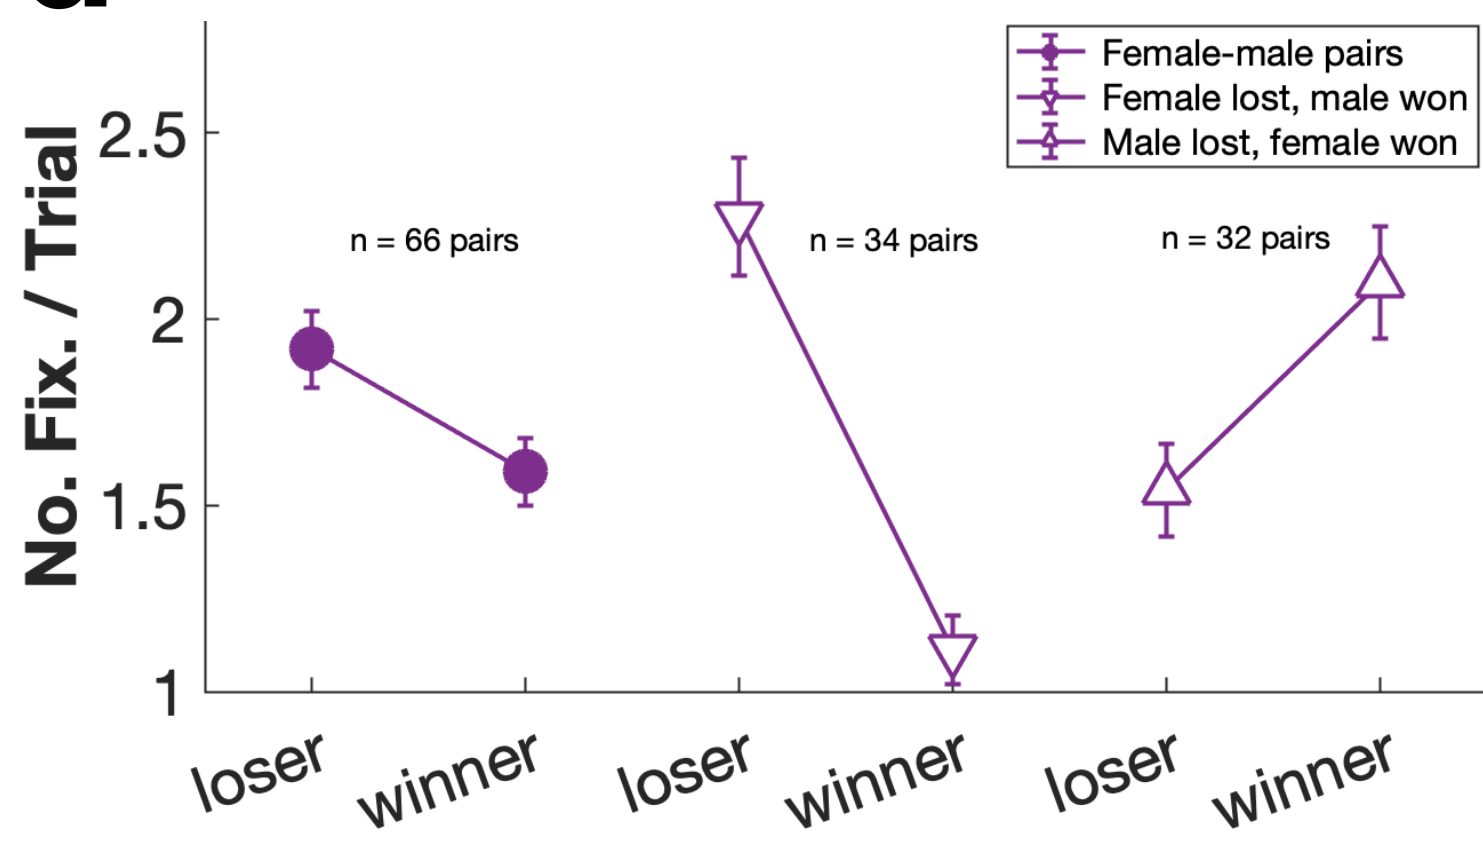

**e**

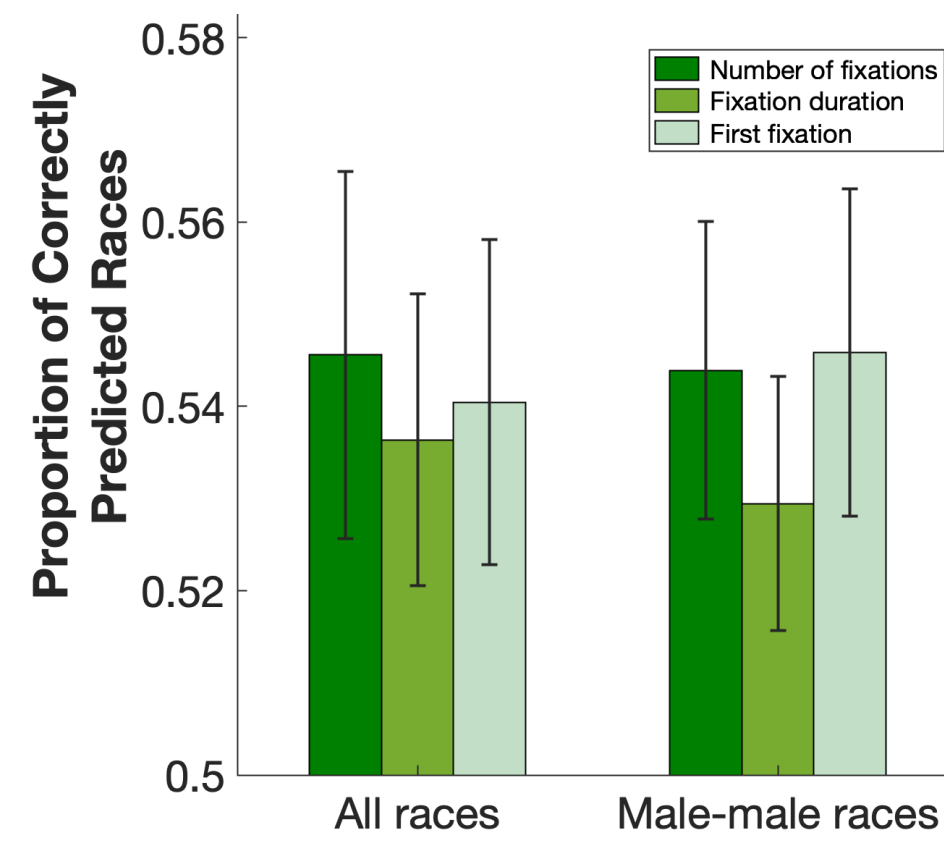

**f**

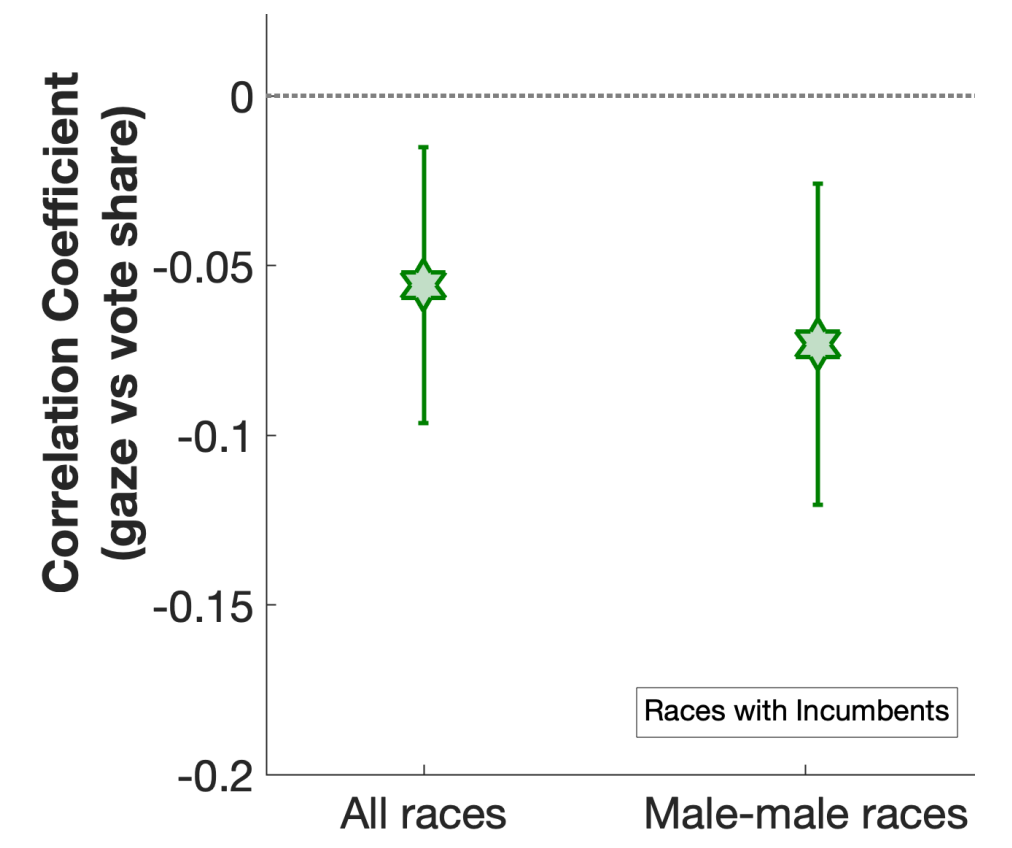

# Supplementary Figure 2

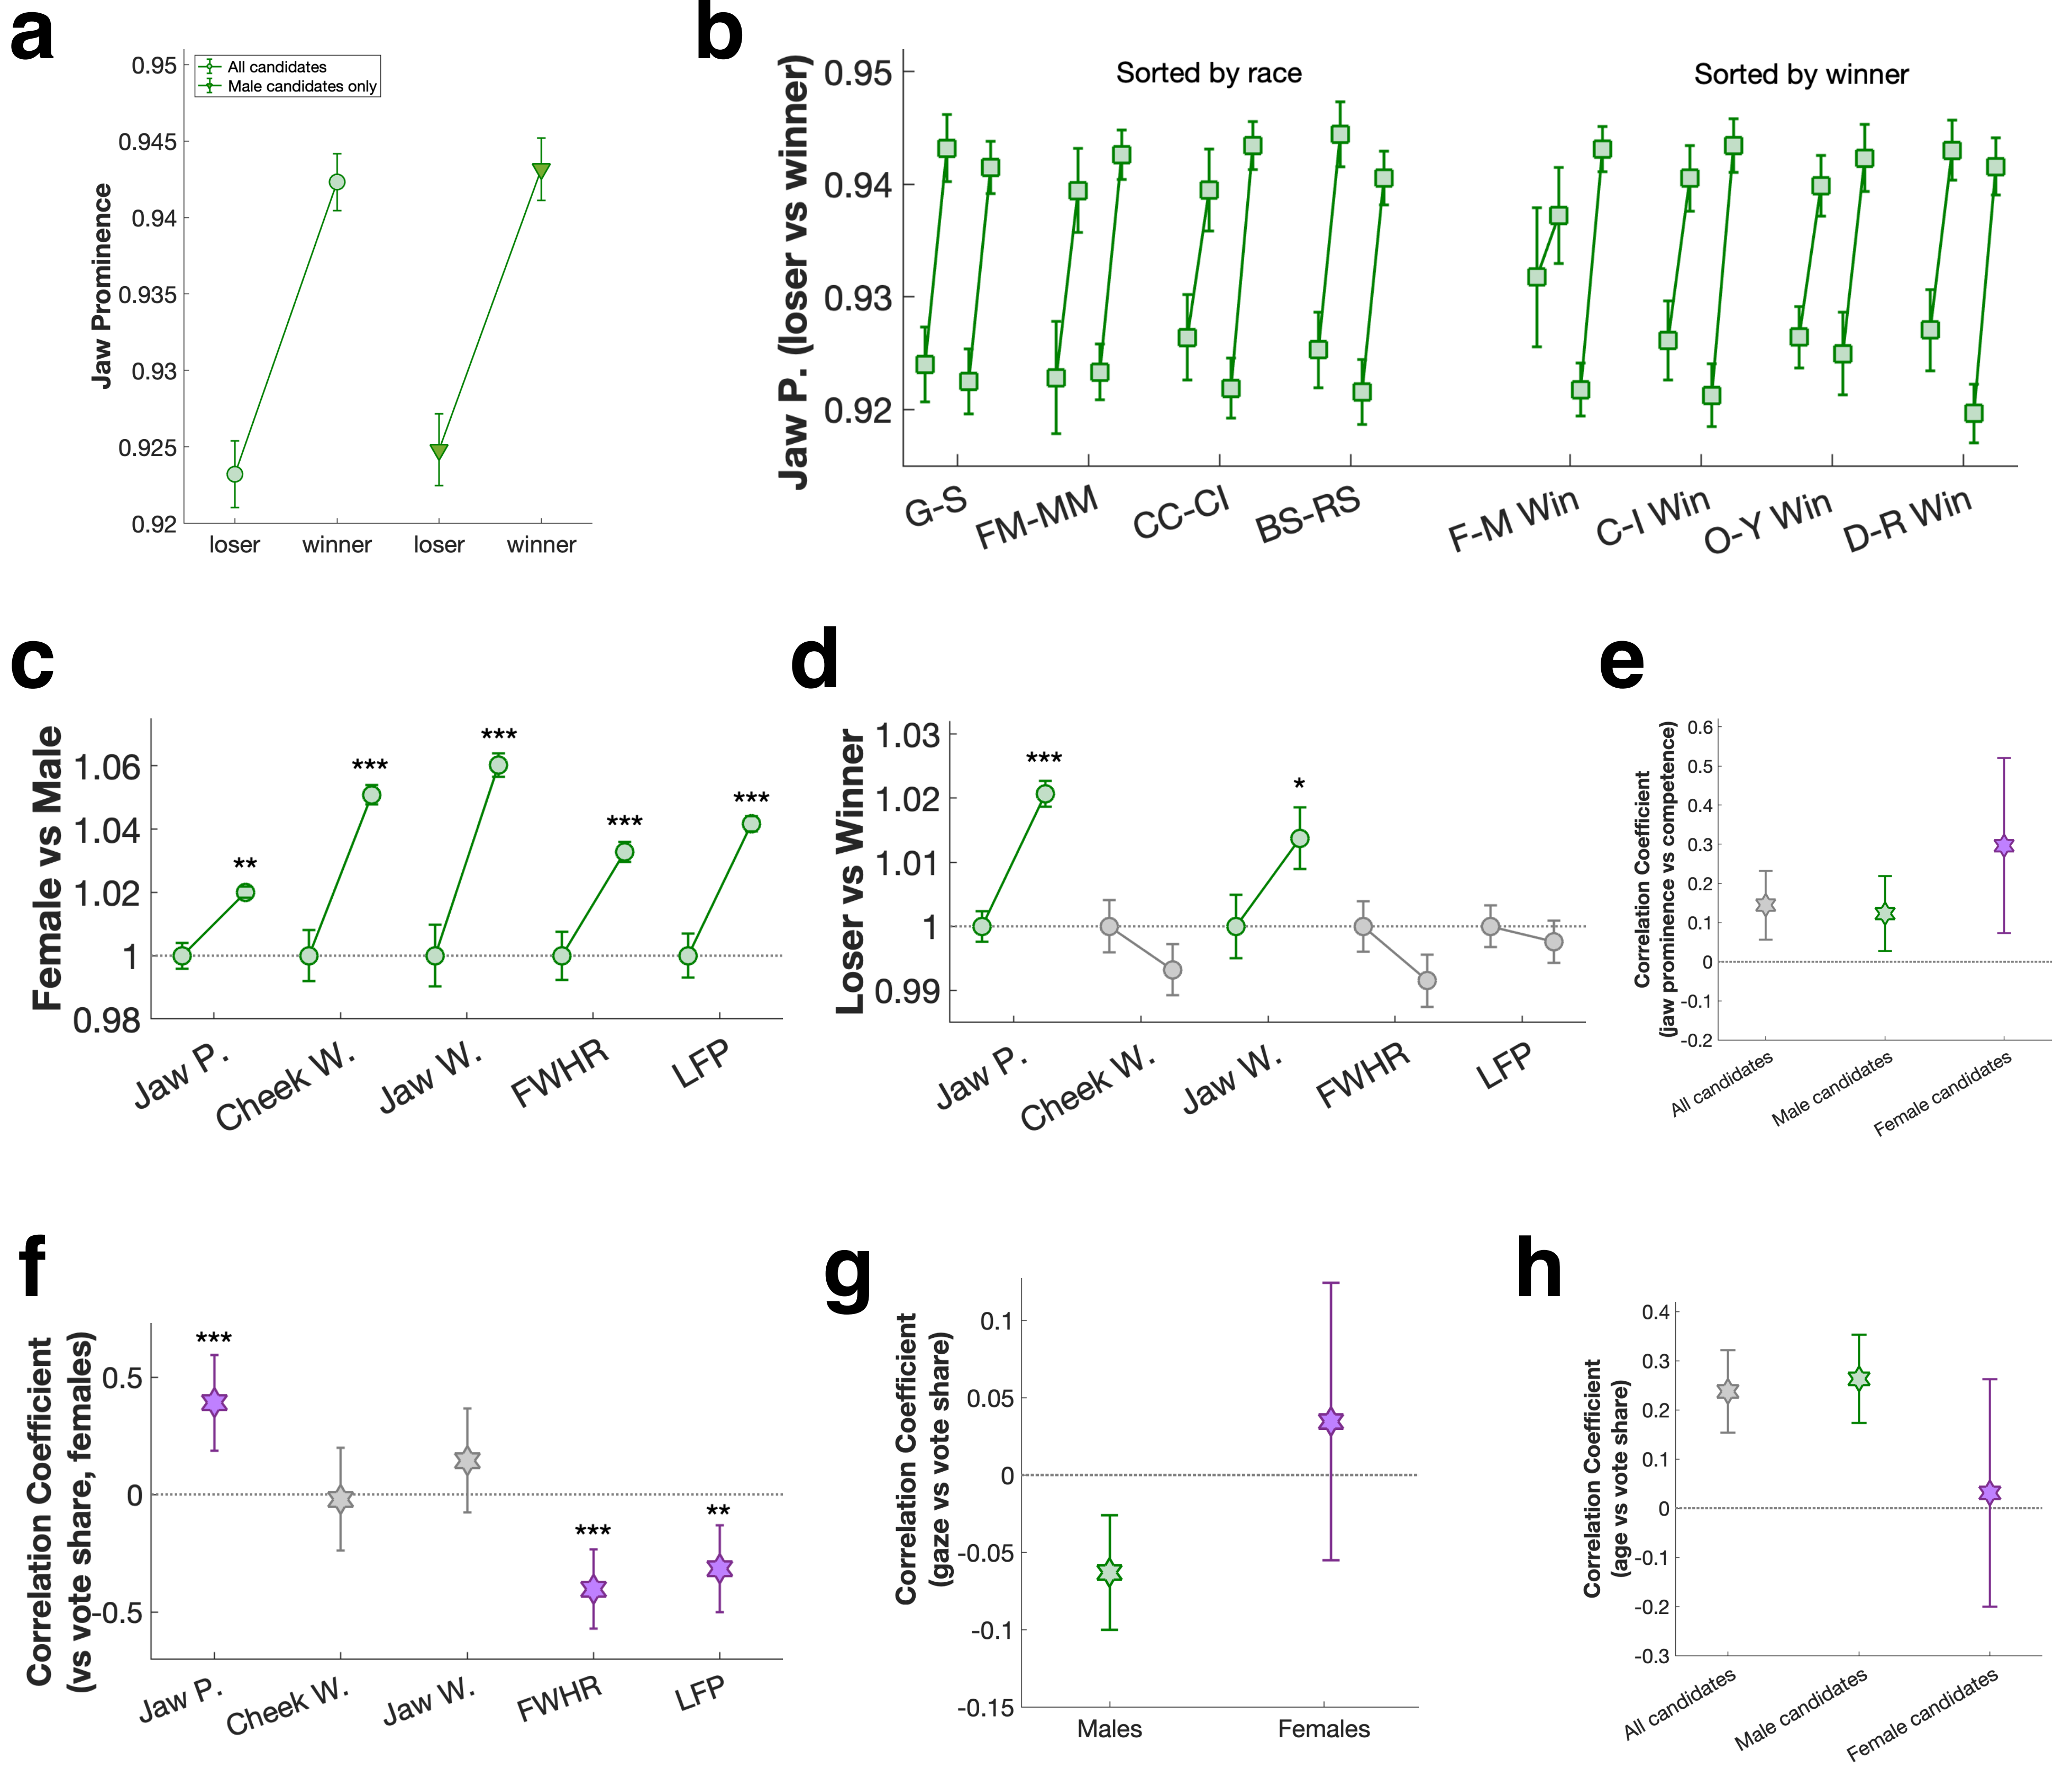

# Supplementary Figure 3

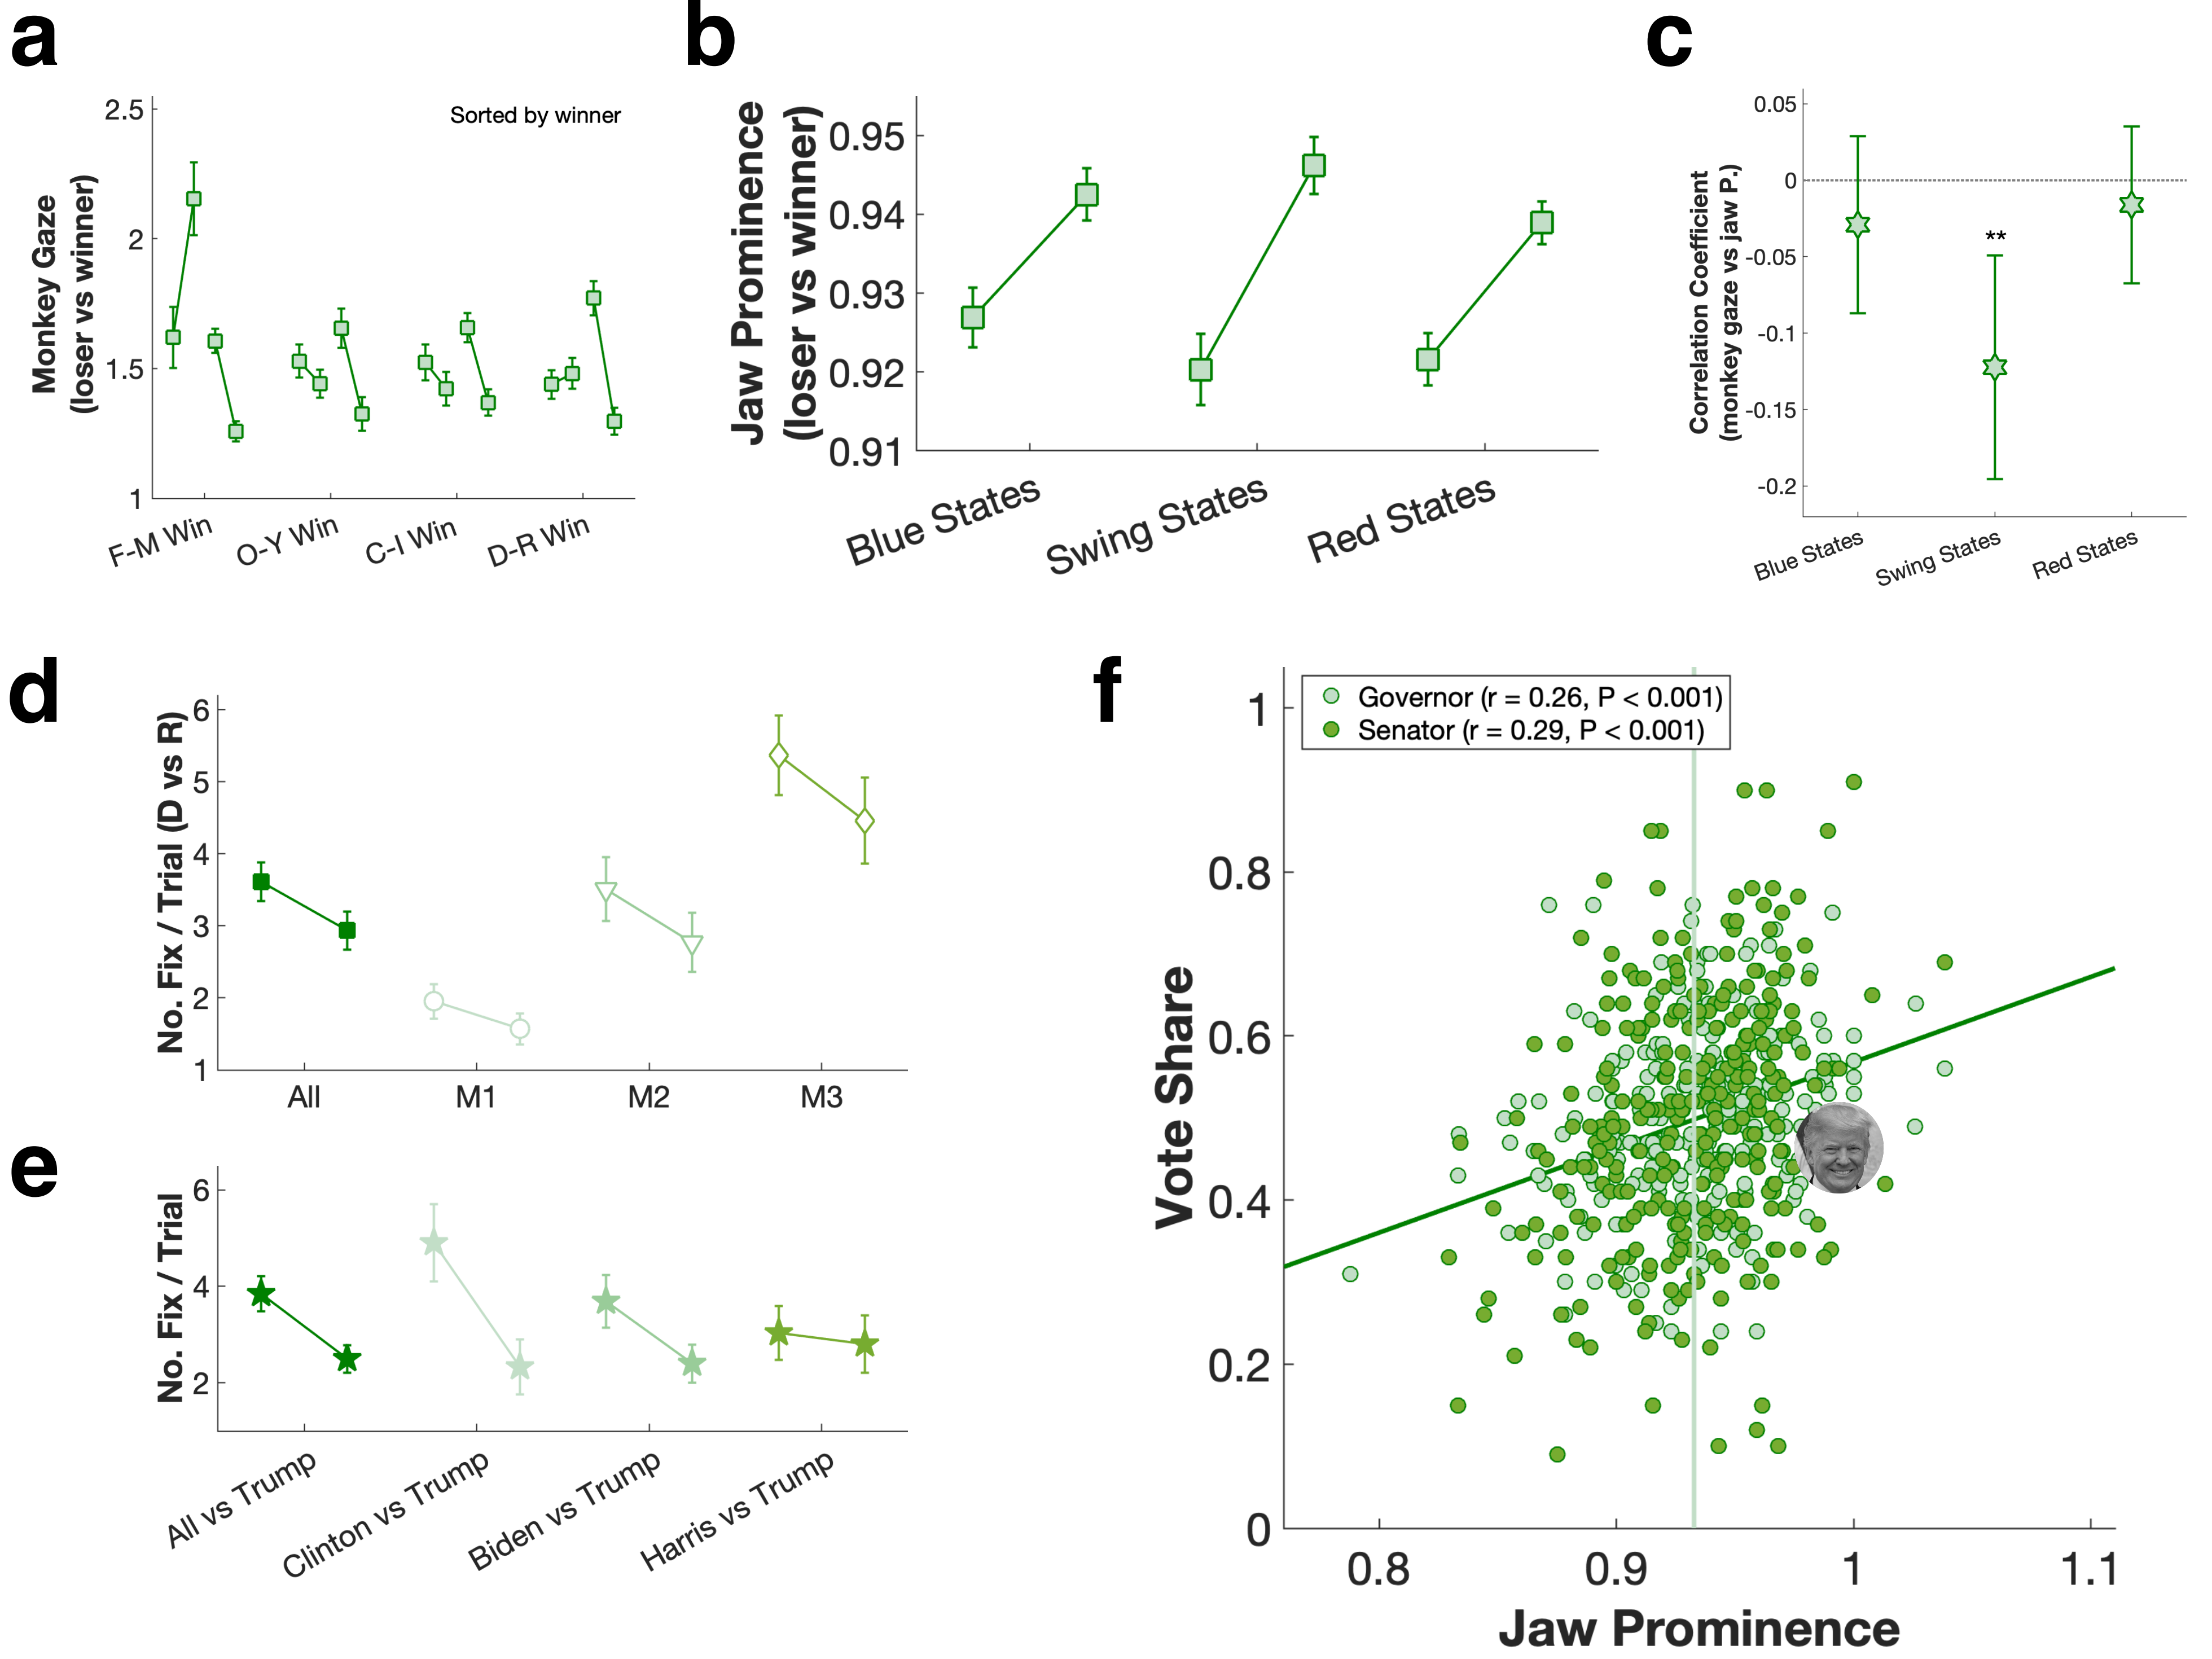

Supplement: media-1.pdf [file media-1.pdf]
